# Supplementary material for: Causal relationship between gut microbiota and risk of esophageal cancer: evidence from Mendelian randomization study
Source: Aging (Albany NY). 2024 Feb 15;16(4):3596–611. doi: 10.18632/aging.205547 (PMC10929825; doi:10.18632/aging.205547)
Supplement: Supplementary Table 1 [file aging-16-205547-s001.xlsx]

## Sheet: Supplementary Table 1
Supplementary Table 1. Instrumental variables (selected SNPs) used in MR analysis of the association between gut microbiota and esophageal cancer.
id.exposure	Outcome	SNP	Effect_allele.exposure	Other_allele.exposure	Effect_allele.outcome	Other_allele.outcome	beta.exposure	beta.outcome	eaf.exposure	eaf.outcome	chr	pos	se.outcome	pval.outcome	chr.exposure	pos.exposure	se.exposure	pval.exposure	id.exposure	action	mr_keep	reliability.exposure	R2	F
Family Porphyromonadaceae	Esophageal cancer	rs10762312	A	G	A	G	0.052368	0.005	0.7386	0.680534	10	71571863	0.0309	0.8717	10	71571863	0.0118814	8.70362e-06	ebi-a-GCST90016947	2	TRUE	high	0.00135609	19.4239
Family Porphyromonadaceae	Esophageal cancer	rs10858364	G	T	G	T	0.055316	0.0121	0.2763	0.272924	9	138076081	0.0353	0.732099	9	138076081	0.012085	4.31062e-06	ebi-a-GCST90016947	2	TRUE	high	0.00146236	20.9482
Family Porphyromonadaceae	Esophageal cancer	rs17065783	A	G	A	G	-0.059133	0.0315	0.2237	0.205444	3	62035586	0.0371	0.397	3	62035586	0.0122235	1.79349e-06	ebi-a-GCST90016947	2	TRUE	high	0.0016332	23.3996
Family Porphyromonadaceae	Esophageal cancer	rs1980561	A	G	A	G	-0.0485289	-0.013	0.3857	0.396123	14	63386516	0.0302	0.666099	14	63386516	0.0109284	8.9454e-06	ebi-a-GCST90016947	2	TRUE	high	0.00137648	19.7164
Family Porphyromonadaceae	Esophageal cancer	rs35233670	T	C	T	C	-0.0473576	0.0328	0.4414	0.513106	17	63750903	0.0306	0.2842	17	63750903	0.010602	7.90988e-06	ebi-a-GCST90016947	2	TRUE	high	0.00139277	19.95
Family Porphyromonadaceae	Esophageal cancer	rs35961441	A	C	A	C	0.0915257	-0.0562	0.0736	0.0562646	1	240929774	0.0756	0.4577	1	240929774	0.0207306	8.37394e-06	ebi-a-GCST90016947	2	TRUE	high	0.00136067	19.4895
Family Porphyromonadaceae	Esophageal cancer	rs6953849	A	G	A	G	0.0718149	-0.1145	0.1471	0.134342	7	69251692	0.0481	0.01725	7	69251692	0.0150724	2.44478e-06	ebi-a-GCST90016947	2	TRUE	high	0.00158437	22.6988
Family Porphyromonadaceae	Esophageal cancer	rs7330827	T	C	T	C	-0.103842	0.0638	0.0755	0.0697027	13	23531802	0.0877	0.4671	13	23531802	0.0237355	8.04896e-06	ebi-a-GCST90016947	2	TRUE	high	0.00133614	19.1376
Family Porphyromonadaceae	Esophageal cancer	rs864093	A	C	A	C	-0.0527939	0.0402	0.2565	0.289521	4	149825977	0.0313	0.1983	4	149825977	0.0117499	9.59798e-06	ebi-a-GCST90016947	2	TRUE	high	0.00140919	20.1854
Genus Candidatus Soleaferrea	Esophageal cancer	rs10090365	G	A	G	A	0.0834413	0.0592	0.4414	0.461517	8	138638199	0.0301	0.0494094	8	138638199	0.0180989	4.17311e-06	ebi-a-GCST90016976	2	TRUE	high	0.00148352	21.2519
Genus Candidatus Soleaferrea	Esophageal cancer	rs10108780	A	G	A	G	-0.092834	0.0261	0.2674	0.312399	8	123882833	0.0326	0.4234	8	123882833	0.0199807	3.64083e-06	ebi-a-GCST90016976	2	TRUE	high	0.00150668	21.584
Genus Candidatus Soleaferrea	Esophageal cancer	rs10809135	C	T	C	T	-0.0834858	0.056	0.5089	0.537778	9	10611282	0.0309	0.0693697	9	10611282	0.0182426	5.4718e-06	ebi-a-GCST90016976	2	TRUE	high	0.00146183	20.9407
Genus Candidatus Soleaferrea	Esophageal cancer	rs36155147	T	C	T	C	-0.104966	0.0521	0.6382	0.6608	7	352368	0.1583	0.742099	7	352368	0.0240995	5.4114e-06	ebi-a-GCST90016976	2	TRUE	high	0.0013243	18.968
Genus Candidatus Soleaferrea	Esophageal cancer	rs4294381	C	T	C	T	-0.112197	0.0762	0.8201	0.831052	1	224688107	0.0413	0.0650594	1	224688107	0.023186	1.36848e-06	ebi-a-GCST90016976	2	TRUE	high	0.00163411	23.4126
Genus Candidatus Soleaferrea	Esophageal cancer	rs4678258	T	C	T	C	0.0986136	-0.035	0.2763	0.198863	3	137945192	0.0403	0.3847	3	137945192	0.0215646	5.53184e-06	ebi-a-GCST90016976	2	TRUE	high	0.00145961	20.9088
Genus Candidatus Soleaferrea	Esophageal cancer	rs6489992	A	G	A	G	-0.0840437	0.013	0.3847	0.316516	12	115352769	0.035	0.7106	12	115352769	0.0187031	7.88787e-06	ebi-a-GCST90016976	2	TRUE	high	0.00140946	20.1894
Genus Candidatus Soleaferrea	Esophageal cancer	rs6494306	A	G	A	G	-0.0969304	0.0474	0.1968	0.271087	15	62394540	0.0324	0.1443	15	62394540	0.0214221	5.80056e-06	ebi-a-GCST90016976	2	TRUE	high	0.00142908	20.4708
Genus Candidatus Soleaferrea	Esophageal cancer	rs7400877	C	T	C	T	0.0951085	-0.0281	0.7495	0.741331	14	76403542	0.0322	0.3829	14	76403542	0.0212799	9.29458e-06	ebi-a-GCST90016976	2	TRUE	high	0.00139436	19.9728
Genus Candidatus Soleaferrea	Esophageal cancer	rs830151	A	G	A	G	-0.194561	-0.008	0.9334	0.941343	19	47985753	0.1021	0.9376	19	47985753	0.0347932	4.25608e-08	ebi-a-GCST90016976	2	TRUE	high	0.002181	31.2653
Genus Candidatus Soleaferrea	Esophageal cancer	rs9973954	G	A	G	A	-0.0892075	0.006	0.6938	0.540619	2	19885907	0.0404	0.8826	2	19885907	0.0195401	5.94799e-06	ebi-a-GCST90016976	2	TRUE	high	0.00145478	20.8396
Genus Catenibacterium	Esophageal cancer	rs12404911	C	T	C	T	0.140717	0.0668	0.17	0.235686	1	240118443	0.0329	0.0422795	1	240118443	0.0304142	2.79892e-06	ebi-a-GCST90016977	2	TRUE	high	0.00149408	21.4032
Genus Catenibacterium	Esophageal cancer	rs212393	A	G	A	G	0.135254	0.0127	0.6899	0.777724	6	159485742	0.0454	0.7791	6	159485742	0.0286209	3.62485e-06	ebi-a-GCST90016977	2	TRUE	high	0.00155861	22.3292
Genus Catenibacterium	Esophageal cancer	rs73128290	A	G	A	G	0.129726	-0.0062	0.2634	0.21198	7	57364320	0.0489	0.8984	7	57364320	0.0284563	4.29368e-06	ebi-a-GCST90016977	2	TRUE	high	0.0014506	20.7796
Genus Catenibacterium	Esophageal cancer	rs77285108	G	A	G	A	-0.161826	-0.0332	0.1461	0.162712	4	122282768	0.0653	0.6106	4	122282768	0.0353447	3.62677e-06	ebi-a-GCST90016977	2	TRUE	high	0.00146317	20.9598
Genus Catenibacterium	Esophageal cancer	rs7742829	C	T	C	T	0.11411	0.0347	0.4195	0.413923	6	105089665	0.0299	0.2451	6	105089665	0.0251099	5.60725e-06	ebi-a-GCST90016977	2	TRUE	high	0.00144149	20.6489
Genus Eubacterium coprostanoligenes group	Esophageal cancer	rs1020520	T	G	T	G	-0.0590705	0.0221	0.2038	0.268117	7	33603146	0.0322	0.4916	7	33603146	0.0132929	8.88976e-06	ebi-a-GCST90016997	2	TRUE	high	0.00137843	19.7443
Genus Eubacterium coprostanoligenes group	Esophageal cancer	rs10444197	A	G	A	G	-0.0505823	-0.0387	0.3678	0.45732	10	2215931	0.0349	0.2669	10	2215931	0.0113455	5.98467e-06	ebi-a-GCST90016997	2	TRUE	high	0.00138749	19.8742
Genus Eubacterium coprostanoligenes group	Esophageal cancer	rs11052069	C	T	C	T	-0.0477832	-0.0428	0.5656	0.523398	12	32713919	0.0304	0.1596	12	32713919	0.0107833	9.37951e-06	ebi-a-GCST90016997	2	TRUE	high	0.00137067	19.633
Genus Eubacterium coprostanoligenes group	Esophageal cancer	rs11720857	C	T	C	T	0.0630776	0.0556	0.1769	0.193974	3	113794507	0.0367	0.1299	3	113794507	0.0144485	9.26254e-06	ebi-a-GCST90016997	2	TRUE	high	0.00133048	19.0565
Genus Eubacterium coprostanoligenes group	Esophageal cancer	rs12906958	C	T	C	T	-0.0533159	-0.0569	0.3022	0.303266	15	36911598	0.0322	0.0773606	15	36911598	0.0115935	4.348e-06	ebi-a-GCST90016997	2	TRUE	high	0.00147613	21.1458
Genus Eubacterium coprostanoligenes group	Esophageal cancer	rs17159861	C	T	C	T	0.0962228	0.0061	0.1332	0.118917	7	31085162	0.0452	0.8935	7	31085162	0.0168388	1.03786e-08	ebi-a-GCST90016997	2	TRUE	high	0.00227733	32.6492
Genus Eubacterium coprostanoligenes group	Esophageal cancer	rs2644213	A	G	A	G	-0.0538845	-0.0277	0.7634	0.724608	10	84506096	0.0321	0.3878	10	84506096	0.0121245	9.85644e-06	ebi-a-GCST90016997	2	TRUE	high	0.00137874	19.7487
Genus Eubacterium coprostanoligenes group	Esophageal cancer	rs4076415	G	T	G	T	-0.0515152	0.0208	0.5994	0.655516	15	86440997	0.0373	0.5775	15	86440997	0.0110294	1.98976e-06	ebi-a-GCST90016997	2	TRUE	high	0.0015226	21.8125
Genus Eubacterium coprostanoligenes group	Esophageal cancer	rs62024432	C	T	C	T	-0.0769698	-0.0331	0.1252	0.104915	15	97869293	0.0467	0.478	15	97869293	0.0172101	7.50205e-06	ebi-a-GCST90016997	2	TRUE	high	0.0013962	19.9992
Genus Eubacterium coprostanoligenes group	Esophageal cancer	rs6762473	A	C	A	C	-0.0521584	0.044	0.6431	0.658717	3	127139574	0.0474	0.3537	3	127139574	0.0112353	4.26108e-06	ebi-a-GCST90016997	2	TRUE	high	0.00150421	21.5486
Genus Eubacterium coprostanoligenes group	Esophageal cancer	rs76898927	G	A	G	A	0.123055	0.0183	0.0477	0.0499884	3	81595477	0.1064	0.8633	3	81595477	0.0266375	4.78983e-06	ebi-a-GCST90016997	2	TRUE	high	0.00148952	21.3379
Genus Eubacterium coprostanoligenes group	Esophageal cancer	rs79895140	T	C	T	C	-0.0641017	0.0208	0.2167	0.181739	2	50797401	0.0596	0.726599	2	50797401	0.0141153	8.61807e-06	ebi-a-GCST90016997	2	TRUE	high	0.00143951	20.6205
Genus Eubacterium coprostanoligenes group	Esophageal cancer	rs9648214	T	C	T	C	-0.0828719	-0.0548	0.1183	0.143834	7	16380806	0.0388	0.1581	7	16380806	0.016431	2.52029e-07	ebi-a-GCST90016997	2	TRUE	high	0.00177499	25.4347
Genus Marvinbryantia	Esophageal cancer	rs11620597	T	C	T	C	0.119479	0.0792	0.0527	0.0542911	13	86079090	0.0944	0.4013	13	86079090	0.0271688	7.80171e-06	ebi-a-GCST90017032	2	TRUE	high	0.00135001	19.3367
Genus Marvinbryantia	Esophageal cancer	rs1187983	C	T	C	T	-0.0935456	-0.0385	0.1223	0.157833	1	58441860	0.0371	0.2993	1	58441860	0.0193174	2.02428e-06	ebi-a-GCST90017032	2	TRUE	high	0.00163651	23.4471
Genus Marvinbryantia	Esophageal cancer	rs146541147	G	A	G	A	0.118845	0.0884	0.0706	0.0574512	19	4542097	0.0941	0.3477	19	4542097	0.0268423	6.86294e-06	ebi-a-GCST90017032	2	TRUE	high	0.00136839	19.6003
Genus Marvinbryantia	Esophageal cancer	rs2724813	G	A	G	A	0.0840769	0.0756	0.7992	0.832592	10	12516924	0.0449	0.0923996	10	12516924	0.0167551	6.28449e-07	ebi-a-GCST90017032	2	TRUE	high	0.00175702	25.1767
Genus Marvinbryantia	Esophageal cancer	rs2842896	C	T	C	T	-0.0649396	-0.0177	0.5278	0.449667	6	132881664	0.0331	0.5926	6	132881664	0.0131146	7.25371e-07	ebi-a-GCST90017032	2	TRUE	high	0.00171099	24.5159
Genus Marvinbryantia	Esophageal cancer	rs2863363	G	A	G	A	-0.0634861	-0.005	0.6322	0.660003	3	166039765	0.0305	0.8698	3	166039765	0.0136323	3.11279e-06	ebi-a-GCST90017032	2	TRUE	high	0.00151371	21.6849
Genus Marvinbryantia	Esophageal cancer	rs3125832	A	C	A	C	0.0679323	0.0285	0.2624	0.288186	1	211400180	0.0316	0.3676	1	211400180	0.015012	5.02736e-06	ebi-a-GCST90017032	2	TRUE	high	0.00142934	20.4746
Genus Marvinbryantia	Esophageal cancer	rs61884471	G	A	G	A	0.124426	-0.0036	0.0845	0.0846485	11	45826561	0.0855	0.9664	11	45826561	0.0248431	1.01163e-06	ebi-a-GCST90017032	2	TRUE	high	0.00175038	25.0813
Genus Marvinbryantia	Esophageal cancer	rs72948274	A	C	A	C	-0.126354	-0.059	0.0577	0.0593708	11	79518683	0.0962	0.5398	11	79518683	0.0272212	3.25912e-06	ebi-a-GCST90017032	2	TRUE	high	0.00150381	21.5428
Genus Marvinbryantia	Esophageal cancer	rs8006832	G	T	G	T	-0.0952415	0.0206	0.1113	0.0970905	14	21577837	0.0505	0.682801	14	21577837	0.0216699	6.58082e-06	ebi-a-GCST90017032	2	TRUE	high	0.00134845	19.3143
Genus Ruminococcaceae UCG010	Esophageal cancer	rs12597105	A	G	A	G	-0.0670855	-0.0186	0.7227	0.745444	16	5233941	0.0335	0.579101	16	5233941	0.0144415	4.87304e-06	ebi-a-GCST90017058	2	TRUE	high	0.00150612	21.5761
Genus Ruminococcaceae UCG010	Esophageal cancer	rs2820282	C	A	C	A	0.0592304	-0.0065	0.5477	0.44463	6	104728618	0.0367	0.8602	6	104728618	0.0125917	2.85384e-06	ebi-a-GCST90017058	2	TRUE	high	0.0015443	22.1238
Genus Ruminococcaceae UCG010	Esophageal cancer	rs682403	A	G	A	G	-0.0588161	-0.0412	0.4761	0.5166	9	135968557	0.0295	0.1619	9	135968557	0.0124671	2.36537e-06	ebi-a-GCST90017058	2	TRUE	high	0.00155335	22.2536
Genus Ruminococcaceae UCG010	Esophageal cancer	rs6958419	C	T	C	T	-0.0585718	-0.0621	0.4891	0.529581	7	16349864	0.0308	0.0441398	7	16349864	0.0124994	2.84165e-06	ebi-a-GCST90017058	2	TRUE	high	0.00153255	21.9552
Genus Ruminococcaceae UCG010	Esophageal cancer	rs73218807	G	A	G	A	-0.166211	-0.1016	0.0577	0.0582857	4	31057482	0.1011	0.3152	4	31057482	0.0367938	6.43028e-06	ebi-a-GCST90017058	2	TRUE	high	0.0014244	20.4037
Genus Ruminococcaceae UCG010	Esophageal cancer	rs7441445	T	C	T	C	0.05695	0.0072	0.5646	0.552826	4	40707798	0.0301	0.8104	4	40707798	0.0126502	6.8019e-06	ebi-a-GCST90017058	2	TRUE	high	0.00141468	20.2643
Genus Ruminococcus1	Esophageal cancer	rs10167839	A	G	A	G	0.0519509	0.0526	0.3439	0.352435	2	181882879	0.0307	0.086449	2	181882879	0.0116306	8.09245e-06	ebi-a-GCST90017062	2	TRUE	high	0.0013927	19.949
Genus Ruminococcus1	Esophageal cancer	rs11783695	G	T	G	T	-0.0734114	-0.0566	0.1511	0.129448	8	144596903	0.0469	0.2278	8	144596903	0.0161398	4.72683e-06	ebi-a-GCST90017062	2	TRUE	high	0.00144406	20.6857
Genus Ruminococcus1	Esophageal cancer	rs17781867	C	T	C	T	0.0999271	0.0998	0.0924	0.086552	17	71256018	0.0812	0.2187	17	71256018	0.0211728	1.96336e-06	ebi-a-GCST90017062	2	TRUE	high	0.00155459	22.2715
Genus Ruminococcus1	Esophageal cancer	rs3819978	C	T	C	T	-0.11504	0.0232	0.0586	0.0553148	1	241789757	0.0688	0.735401	1	241789757	0.0260137	8.74138e-06	ebi-a-GCST90017062	2	TRUE	high	0.00136516	19.5539
Genus Ruminococcus1	Esophageal cancer	rs6105066	T	C	T	C	-0.0607052	0.0013	0.2495	0.217536	20	13258628	0.0392	0.9746	20	13258628	0.013425	5.05918e-06	ebi-a-GCST90017062	2	TRUE	high	0.0014272	20.4438
Genus Ruminococcus1	Esophageal cancer	rs6493760	T	C	T	C	-0.0535262	-0.0547	0.6034	0.640163	15	55439182	0.0325	0.0918904	15	55439182	0.0115885	3.38361e-06	ebi-a-GCST90017062	2	TRUE	high	0.00148906	21.3313
Genus Ruminococcus1	Esophageal cancer	rs7117576	A	G	A	G	0.0829505	0.0572	0.0885	0.0884539	11	114023573	0.0634	0.3667	11	114023573	0.0170891	6.47978e-07	ebi-a-GCST90017062	2	TRUE	high	0.00164425	23.558
Genus Ruminococcus1	Esophageal cancer	rs7583465	C	T	C	T	0.0527654	0.0321	0.3767	0.391493	2	10533921	0.0306	0.2939	2	10533921	0.0112619	2.55611e-06	ebi-a-GCST90017062	2	TRUE	high	0.00153211	21.949
Genus Ruminococcus1	Esophageal cancer	rs78572139	G	A	G	A	0.125038	-0.0378	0.0706	0.0722248	5	15944587	0.0926	0.6829	5	15944587	0.0279411	5.23106e-06	ebi-a-GCST90017062	2	TRUE	high	0.00139788	20.0233
Genus Ruminococcus1	Esophageal cancer	rs78613526	G	A	G	A	0.167497	-0.0169	0.0427	0.0546336	2	65925212	0.0696	0.8081	2	65925212	0.0367639	5.11423e-06	ebi-a-GCST90017062	2	TRUE	high	0.00144885	20.7544
Genus Sutterella	Esophageal cancer	rs1145877	G	A	G	A	0.073548	0.0103	0.841	0.824457	6	82386821	0.037	0.7801	6	82386821	0.0162413	7.19946e-06	ebi-a-GCST90017072	2	TRUE	high	0.0014314	20.504
Genus Sutterella	Esophageal cancer	rs11591622	T	G	T	G	-0.0688382	-0.0814	0.2157	0.221493	10	102520687	0.0531	0.1254	10	102520687	0.0151375	6.4986e-06	ebi-a-GCST90017072	2	TRUE	high	0.00144346	20.6771
Genus Sutterella	Esophageal cancer	rs13173038	A	G	A	G	-0.0718076	-0.0407	0.2207	0.218746	5	58499183	0.0359	0.2574	5	58499183	0.0151627	2.72986e-06	ebi-a-GCST90017072	2	TRUE	high	0.00156527	22.4247
Genus Sutterella	Esophageal cancer	rs143438747	T	C	T	C	-0.145793	0.0944	0.0547	0.0660733	1	63278549	0.0936	0.3129	1	63278549	0.0306867	3.2802e-06	ebi-a-GCST90017072	2	TRUE	high	0.00157532	22.569
Genus Sutterella	Esophageal cancer	rs2050185	A	G	A	G	-0.0575138	-0.0514	0.6223	0.623706	6	147936781	0.0303	0.0894396	6	147936781	0.0128766	7.96948e-06	ebi-a-GCST90017072	2	TRUE	high	0.00139257	19.9472
Genus Sutterella	Esophageal cancer	rs2321387	G	A	G	A	-0.0592876	-0.0086	0.5298	0.404993	13	58689340	0.0316	0.7863	13	58689340	0.0124509	1.86518e-06	ebi-a-GCST90017072	2	TRUE	high	0.00158241	22.6707
Genus Sutterella	Esophageal cancer	rs2613606	T	C	T	C	0.0556794	0.0018	0.6064	0.571213	7	111285025	0.0455	0.9689	7	111285025	0.0124117	7.20228e-06	ebi-a-GCST90017072	2	TRUE	high	0.00140475	20.1218
Genus Sutterella	Esophageal cancer	rs607327	T	C	T	C	-0.0578334	-0.0517	0.6233	0.6676	11	111695709	0.0329	0.1164	11	111695709	0.0129053	6.63056e-06	ebi-a-GCST90017072	2	TRUE	high	0.00140182	20.0799
Genus Sutterella	Esophageal cancer	rs62501473	G	A	G	A	0.0694233	0.0087	0.2286	0.251309	7	150126751	0.0522	0.8676	7	150126751	0.0149416	5.51849e-06	ebi-a-GCST90017072	2	TRUE	high	0.00150676	21.5852
Genus Sutterella	Esophageal cancer	rs7499539	A	G	A	G	0.0617478	0.0419	0.3231	0.32979	16	85038065	0.0305	0.1695	16	85038065	0.0130998	2.35771e-06	ebi-a-GCST90017072	2	TRUE	high	0.00155068	22.2153
Genus Sutterella	Esophageal cancer	rs7638039	T	C	T	C	0.0645624	0.008	0.2326	0.235922	3	70588939	0.0355	0.8218	3	70588939	0.0143887	8.66403e-06	ebi-a-GCST90017072	2	TRUE	high	0.00140536	20.1305
Genus Sutterella	Esophageal cancer	rs9350083	T	G	T	G	-0.0593069	-0.0341	0.2992	0.287148	6	18583878	0.0346	0.3257	6	18583878	0.0133929	8.22773e-06	ebi-a-GCST90017072	2	TRUE	high	0.00136883	19.6065
