# Supplementary material for: Causal relationship between gut microbiota and risk of esophageal cancer: evidence from Mendelian randomization study
Source: Aging (Albany NY). 2024 Feb 15;16(4):3596–611. doi: 10.18632/aging.205547 (PMC10929825; doi:10.18632/aging.205547)
Supplement: Supplementary Table 2 [file aging-16-205547-s002.xlsx]

## Sheet: Supplemental Table 2
Supplementary Table 2. Instrumental variables (selected SNPs) used in bidirectional MR analysis of the association between esophageal cancer and gut microbiota.
Exposure	Outcome	SNP	effect_allele.exposure	other_allele.exposure	effect_allele.outcome	other_allele.outcome	beta.exposure	beta.outcome	eaf.exposure	chr	pos	se.outcome	samplesize.outcome	pval.outcome	mr_keep.outcome	chr.exposure	pos.exposure	se.exposure	pval.exposure	samplesize.exposure	action	reliability.exposure	R2	F
Esophageal cancer	Class Negativicutes	rs10220507	G	A	G	A	-0.1546	-0.00828442	0.3091	14	101543594	0.0114379	14306	0.45641	TRUE	14	101543594	0.0349	9.22699e-06	476306	2	high	4.11969e-05	19.623
Esophageal cancer	Class Negativicutes	rs1045670	A	G	A	G	0.1907	-0.00300408	0.0596	12	113335681	0.0260923	14306	0.61029	TRUE	12	113335681	0.0379	4.88304e-07	476306	2	high	5.31513e-05	25.3175
Esophageal cancer	Class Negativicutes	rs11065774	A	G	A	G	0.3412	-0.00142436	0.0855	12	111355326	0.0313067	14306	0.981593	TRUE	12	111355326	0.0481	1.2939e-12	476306	2	high	0.000105632	50.3183
Esophageal cancer	Class Negativicutes	rs115086863	C	T	C	T	-0.4913	0.0663068	0.0507	5	66895252	0.0484575	14306	0.24014	TRUE	5	66806197	0.1054	3.14101e-06	476306	2	high	4.56149e-05	21.7275
Esophageal cancer	Class Negativicutes	rs12203623	A	G	A	G	0.2774	-0.0101965	0.1481	6	95977915	0.0145618	14306	0.585692	TRUE	6	95977915	0.0627	9.68791e-06	476306	2	high	4.10936e-05	19.5738
Esophageal cancer	Class Negativicutes	rs1339961	G	T	G	T	0.1637	0.000704092	0.3002	1	193296113	0.0115826	14306	0.967068	TRUE	1	193296113	0.0307	1.011e-07	476306	2	high	5.9691e-05	28.4327
Esophageal cancer	Class Negativicutes	rs1409582	T	C	T	C	0.1978	0.0198499	0.8767	13	75086449	0.017218	14306	0.311649	TRUE	13	75086449	0.0443	8.02195e-06	476306	2	high	4.18544e-05	19.9362
Esophageal cancer	Class Negativicutes	rs1999375	C	A	C	A	0.1511	-0.0149908	0.3857	6	167576698	0.0108238	14306	0.171153	TRUE	6	167576698	0.03	4.93901e-07	476306	2	high	5.32571e-05	25.3679
Esophageal cancer	Class Negativicutes	rs2238675	T	C	T	C	0.2179	-0.0373501	0.1123	19	19336608	0.0163086	14306	0.0220095	TRUE	19	19336608	0.0475	4.517e-06	476306	2	high	4.41796e-05	21.0439
Esophageal cancer	Class Negativicutes	rs2533449	G	T	G	T	0.1629	-0.00520783	0.7048	7	69147703	0.0115076	14306	0.653194	TRUE	7	69147703	0.0323	4.77595e-07	476306	2	high	5.33984e-05	25.4352
Esophageal cancer	Class Negativicutes	rs284787	A	G	A	G	-0.291	0.000959623	0.2197	4	100333556	0.0126627	14306	0.955814	TRUE	4	100333556	0.0339	8.26228e-18	476306	2	high	0.00015468	73.686
Esophageal cancer	Class Negativicutes	rs577449462	C	A	C	A	0.3944	-0.00622884	0.0676	6	31904306	0.0249383	14306	0.77602	TRUE	6	31900232	0.0884	8.20503e-06	476306	2	high	4.17893e-05	19.9052
Esophageal cancer	Class Negativicutes	rs61987837	T	C	T	C	0.3721	-0.0186395	0.0885	14	65739107	0.0193441	14306	0.327347	TRUE	14	65739107	0.0812	4.60797e-06	476306	2	high	4.40861e-05	20.9993
Esophageal cancer	Class Negativicutes	rs62257632	A	C	A	C	0.5731	0.00948553	0.0427	3	4065339	0.0262011	14306	0.761768	TRUE	3	4058909	0.1122	3.22597e-07	476306	2	high	5.47728e-05	26.09
Esophageal cancer	Class Negativicutes	rs62290900	G	A	G	A	0.4553	-0.0466058	0.0517	3	185753244	0.0254597	14306	0.0693107	TRUE	3	185753244	0.1001	5.37601e-06	476306	2	high	4.34332e-05	20.6883
Esophageal cancer	Class Negativicutes	rs62305755	A	G	A	G	0.2175	0.00997297	0.1988	4	100150020	0.0129504	14306	0.457979	TRUE	4	100150020	0.043	4.26904e-07	476306	2	high	5.37121e-05	25.5847
Esophageal cancer	Class Negativicutes	rs890489	A	G	A	G	0.3051	-0.0284496	0.1302	17	53713610	0.0175193	14306	0.0912704	TRUE	17	53713610	0.0686	8.73595e-06	476306	2	high	4.15271e-05	19.7804
Esophageal cancer	Class Negativicutes	rs9308343	A	G	A	G	0.1593	-0.00457022	0.5457	16	87224857	0.0105995	14306	0.663076	TRUE	16	87224857	0.0355	7.01003e-06	476306	2	high	4.22737e-05	20.136
Esophageal cancer	Genus Butyricicoccus	rs10220507	G	A	G	A	-0.1546	0.00343092	0.3091	14	101543594	0.0117404	14306	0.773478	TRUE	14	101543594	0.0349	9.22699e-06	476306	2	high	4.11969e-05	19.623
Esophageal cancer	Genus Butyricicoccus	rs1045670	A	G	A	G	0.1907	-0.0483641	0.0596	12	113335681	0.0279745	14306	0.0491451	TRUE	12	113335681	0.0379	4.88304e-07	476306	2	high	5.31513e-05	25.3175
Esophageal cancer	Genus Butyricicoccus	rs11065774	A	G	A	G	0.3412	-0.0127571	0.0855	12	111355326	0.0328844	14306	0.693541	TRUE	12	111355326	0.0481	1.2939e-12	476306	2	high	0.000105632	50.3183
Esophageal cancer	Genus Butyricicoccus	rs115086863	C	T	C	T	-0.4913	0.0794595	0.0507	5	66895252	0.0518224	14306	0.0760291	TRUE	5	66806197	0.1054	3.14101e-06	476306	2	high	4.56149e-05	21.7275
Esophageal cancer	Genus Butyricicoccus	rs12203623	A	G	A	G	0.2774	-0.00677501	0.1481	6	95977915	0.0148723	14306	0.772835	TRUE	6	95977915	0.0627	9.68791e-06	476306	2	high	4.10936e-05	19.5738
Esophageal cancer	Genus Butyricicoccus	rs1339961	G	T	G	T	0.1637	-0.0147116	0.3002	1	193296113	0.0119169	14306	0.222237	TRUE	1	193296113	0.0307	1.011e-07	476306	2	high	5.9691e-05	28.4327
Esophageal cancer	Genus Butyricicoccus	rs1409582	T	C	T	C	0.1978	-0.0113879	0.8767	13	75086449	0.017639	14306	0.451299	TRUE	13	75086449	0.0443	8.02195e-06	476306	2	high	4.18544e-05	19.9362
Esophageal cancer	Genus Butyricicoccus	rs1999375	C	A	C	A	0.1511	-0.00990835	0.3857	6	167576698	0.0111489	14306	0.388082	TRUE	6	167576698	0.03	4.93901e-07	476306	2	high	5.32571e-05	25.3679
Esophageal cancer	Genus Butyricicoccus	rs2238675	T	C	T	C	0.2179	-0.029796	0.1123	19	19336608	0.0167228	14306	0.0711214	TRUE	19	19336608	0.0475	4.517e-06	476306	2	high	4.41796e-05	21.0439
Esophageal cancer	Genus Butyricicoccus	rs2533449	G	T	G	T	0.1629	-0.0130781	0.7048	7	69147703	0.0117865	14306	0.280152	TRUE	7	69147703	0.0323	4.77595e-07	476306	2	high	5.33984e-05	25.4352
Esophageal cancer	Genus Butyricicoccus	rs284787	A	G	A	G	-0.291	-0.00644898	0.2197	4	100333556	0.0130315	14306	0.657049	TRUE	4	100333556	0.0339	8.26228e-18	476306	2	high	0.00015468	73.686
Esophageal cancer	Genus Butyricicoccus	rs577449462	C	A	C	A	0.3944	0.0330682	0.0676	6	31904306	0.0257663	14306	0.24209	TRUE	6	31900232	0.0884	8.20503e-06	476306	2	high	4.17893e-05	19.9052
Esophageal cancer	Genus Butyricicoccus	rs61987837	T	C	T	C	0.3721	-0.00756598	0.0885	14	65739107	0.0199529	14306	0.744029	TRUE	14	65739107	0.0812	4.60797e-06	476306	2	high	4.40861e-05	20.9993
Esophageal cancer	Genus Butyricicoccus	rs62257632	A	C	A	C	0.5731	-0.0477445	0.0427	3	4065339	0.0267547	14306	0.0713214	TRUE	3	4058909	0.1122	3.22597e-07	476306	2	high	5.47728e-05	26.09
Esophageal cancer	Genus Butyricicoccus	rs62290900	G	A	G	A	0.4553	-0.0298965	0.0517	3	185753244	0.0257992	14306	0.254641	TRUE	3	185753244	0.1001	5.37601e-06	476306	2	high	4.34332e-05	20.6883
Esophageal cancer	Genus Butyricicoccus	rs62305755	A	G	A	G	0.2175	-0.00198812	0.1988	4	100150020	0.0133237	14306	0.838449	TRUE	4	100150020	0.043	4.26904e-07	476306	2	high	5.37121e-05	25.5847
Esophageal cancer	Genus Butyricicoccus	rs890489	A	G	A	G	0.3051	0.00386302	0.1302	17	53713610	0.0178623	14306	0.849293	TRUE	17	53713610	0.0686	8.73595e-06	476306	2	high	4.15271e-05	19.7804
Esophageal cancer	Genus Butyricicoccus	rs9308343	A	G	A	G	0.1593	-0.0115309	0.5457	16	87224857	0.0109074	14306	0.283818	TRUE	16	87224857	0.0355	7.01003e-06	476306	2	high	4.22737e-05	20.136
Esophageal cancer	Genus Eggerthella	rs10220507	G	A	G	A	-0.1546	0.0328232	0.3091	14	101543594	0.0212956	14306	0.113671	TRUE	14	101543594	0.0349	9.22699e-06	476306	2	high	4.11969e-05	19.623
Esophageal cancer	Genus Eggerthella	rs11065774	A	G	A	G	0.3412	-0.0202203	0.0855	12	111355606	0.0340351	14306	0.508535	TRUE	12	111355326	0.0481	1.2939e-12	476306	2	high	0.000105632	50.3183
Esophageal cancer	Genus Eggerthella	rs12203623	A	G	A	G	0.2774	-0.0577473	0.1481	6	95977915	0.0268843	14306	0.0409619	TRUE	6	95977915	0.0627	9.68791e-06	476306	2	high	4.10936e-05	19.5738
Esophageal cancer	Genus Eggerthella	rs1339961	G	T	G	T	0.1637	0.0238392	0.3002	1	193296113	0.0217293	14306	0.276688	TRUE	1	193296113	0.0307	1.011e-07	476306	2	high	5.9691e-05	28.4327
Esophageal cancer	Genus Eggerthella	rs1409582	T	C	T	C	0.1978	-0.0155104	0.8767	13	75086449	0.032157	14306	0.685323	TRUE	13	75086449	0.0443	8.02195e-06	476306	2	high	4.18544e-05	19.9362
Esophageal cancer	Genus Eggerthella	rs1999375	C	A	C	A	0.1511	0.00956441	0.3857	6	167576698	0.0203486	14306	0.643323	TRUE	6	167576698	0.03	4.93901e-07	476306	2	high	5.32571e-05	25.3679
Esophageal cancer	Genus Eggerthella	rs2238675	T	C	T	C	0.2179	0.0342405	0.1123	19	19336608	0.0304599	14306	0.292846	TRUE	19	19336608	0.0475	4.517e-06	476306	2	high	4.41796e-05	21.0439
Esophageal cancer	Genus Eggerthella	rs2533449	G	T	G	T	0.1629	-0.0046907	0.7048	7	69147703	0.0213218	14306	0.843257	TRUE	7	69147703	0.0323	4.77595e-07	476306	2	high	5.33984e-05	25.4352
Esophageal cancer	Genus Eggerthella	rs284787	A	G	A	G	-0.291	0.0345379	0.2197	4	100333556	0.0236617	14306	0.161586	TRUE	4	100333556	0.0339	8.26228e-18	476306	2	high	0.00015468	73.686
Esophageal cancer	Genus Eggerthella	rs577449462	C	A	C	A	0.3944	-0.00312192	0.0676	6	31904306	0.0472825	14306	0.994361	TRUE	6	31900232	0.0884	8.20503e-06	476306	2	high	4.17893e-05	19.9052
Esophageal cancer	Genus Eggerthella	rs61987837	T	C	T	C	0.3721	-0.0684205	0.0885	14	65739107	0.0364687	14306	0.0763853	TRUE	14	65739107	0.0812	4.60797e-06	476306	2	high	4.40861e-05	20.9993
Esophageal cancer	Genus Eggerthella	rs62257632	A	C	A	C	0.5731	-0.0885961	0.0427	3	4065339	0.0477413	14306	0.0604965	TRUE	3	4058909	0.1122	3.22597e-07	476306	2	high	5.47728e-05	26.09
Esophageal cancer	Genus Eggerthella	rs62290900	G	A	G	A	0.4553	-0.0468318	0.0517	3	185753244	0.0466741	14306	0.322767	TRUE	3	185753244	0.1001	5.37601e-06	476306	2	high	4.34332e-05	20.6883
Esophageal cancer	Genus Eggerthella	rs62305755	A	G	A	G	0.2175	-0.0144595	0.1988	4	100150020	0.0243531	14306	0.536552	TRUE	4	100150020	0.043	4.26904e-07	476306	2	high	5.37121e-05	25.5847
Esophageal cancer	Genus Eggerthella	rs890489	A	G	A	G	0.3051	0.0481153	0.1302	17	53713610	0.0323407	14306	0.118029	TRUE	17	53713610	0.0686	8.73595e-06	476306	2	high	4.15271e-05	19.7804
Esophageal cancer	Genus Eggerthella	rs9308343	A	G	A	G	0.1593	0.000177815	0.5457	16	87224857	0.0198942	14306	0.986785	TRUE	16	87224857	0.0355	7.01003e-06	476306	2	high	4.22737e-05	20.136
Esophageal cancer	Genus Eubacterium Xylanophilum Group	rs10220507	G	A	G	A	-0.1546	-0.00551211	0.3091	14	101543594	0.0134412	14306	0.681262	TRUE	14	101543594	0.0349	9.22699e-06	476306	2	high	4.11969e-05	19.623
Esophageal cancer	Genus Eubacterium Xylanophilum Group	rs1045670	A	G	A	G	0.1907	-0.0117007	0.0596	12	113335681	0.0326742	14306	0.65301	TRUE	12	113335681	0.0379	4.88304e-07	476306	2	high	5.31513e-05	25.3175
Esophageal cancer	Genus Eubacterium Xylanophilum Group	rs11065774	A	G	A	G	0.3412	0.00842081	0.0855	12	111355326	0.0372676	14306	0.79653	TRUE	12	111355326	0.0481	1.2939e-12	476306	2	high	0.000105632	50.3183
Esophageal cancer	Genus Eubacterium Xylanophilum Group	rs12203623	A	G	A	G	0.2774	-0.00340619	0.1481	6	95977915	0.0167142	14306	0.858983	TRUE	6	95977915	0.0627	9.68791e-06	476306	2	high	4.10936e-05	19.5738
Esophageal cancer	Genus Eubacterium Xylanophilum Group	rs1339961	G	T	G	T	0.1637	-0.00145375	0.3002	1	193296113	0.0135691	14306	0.918396	TRUE	1	193296113	0.0307	1.011e-07	476306	2	high	5.9691e-05	28.4327
Esophageal cancer	Genus Eubacterium Xylanophilum Group	rs1409582	T	C	T	C	0.1978	0.00349614	0.8767	13	75086449	0.0199891	14306	0.834347	TRUE	13	75086449	0.0443	8.02195e-06	476306	2	high	4.18544e-05	19.9362
Esophageal cancer	Genus Eubacterium Xylanophilum Group	rs1999375	C	A	C	A	0.1511	-0.00347275	0.3857	6	167576698	0.0126617	14306	0.785104	TRUE	6	167576698	0.03	4.93901e-07	476306	2	high	5.32571e-05	25.3679
Esophageal cancer	Genus Eubacterium Xylanophilum Group	rs2238675	T	C	T	C	0.2179	-0.0100267	0.1123	19	19336608	0.0189982	14306	0.603957	TRUE	19	19336608	0.0475	4.517e-06	476306	2	high	4.41796e-05	21.0439
Esophageal cancer	Genus Eubacterium Xylanophilum Group	rs2533449	G	T	G	T	0.1629	-0.0122059	0.7048	7	69147703	0.0134581	14306	0.36529	TRUE	7	69147703	0.0323	4.77595e-07	476306	2	high	5.33984e-05	25.4352
Esophageal cancer	Genus Eubacterium Xylanophilum Group	rs284787	A	G	A	G	-0.291	0.0200069	0.2197	4	100333556	0.014743	14306	0.162081	TRUE	4	100333556	0.0339	8.26228e-18	476306	2	high	0.00015468	73.686
Esophageal cancer	Genus Eubacterium Xylanophilum Group	rs577449462	C	A	C	A	0.3944	0.0227431	0.0676	6	31904306	0.0291698	14306	0.485258	TRUE	6	31900232	0.0884	8.20503e-06	476306	2	high	4.17893e-05	19.9052
Esophageal cancer	Genus Eubacterium Xylanophilum Group	rs61987837	T	C	T	C	0.3721	-0.0325073	0.0885	14	65739107	0.0223923	14306	0.16476	TRUE	14	65739107	0.0812	4.60797e-06	476306	2	high	4.40861e-05	20.9993
Esophageal cancer	Genus Eubacterium Xylanophilum Group	rs62257632	A	C	A	C	0.5731	-0.0193301	0.0427	3	4065339	0.0297354	14306	0.523551	TRUE	3	4058909	0.1122	3.22597e-07	476306	2	high	5.47728e-05	26.09
Esophageal cancer	Genus Eubacterium Xylanophilum Group	rs62290900	G	A	G	A	0.4553	-0.0131312	0.0517	3	185753244	0.0288975	14306	0.659137	TRUE	3	185753244	0.1001	5.37601e-06	476306	2	high	4.34332e-05	20.6883
Esophageal cancer	Genus Eubacterium Xylanophilum Group	rs62305755	A	G	A	G	0.2175	-0.0248812	0.1988	4	100150020	0.0150252	14306	0.103618	TRUE	4	100150020	0.043	4.26904e-07	476306	2	high	5.37121e-05	25.5847
Esophageal cancer	Genus Eubacterium Xylanophilum Group	rs890489	A	G	A	G	0.3051	-0.0233215	0.1302	17	53713610	0.0200843	14306	0.207778	TRUE	17	53713610	0.0686	8.73595e-06	476306	2	high	4.15271e-05	19.7804
Esophageal cancer	Genus Eubacterium Xylanophilum Group	rs9308343	A	G	A	G	0.1593	-0.0295234	0.5457	16	87224857	0.0123749	14306	0.0165055	TRUE	16	87224857	0.0355	7.01003e-06	476306	2	high	4.22737e-05	20.136
Esophageal cancer	Genus Intestinimonas	rs10220507	G	A	G	A	-0.1546	0.00177511	0.3091	14	101543594	0.0140583	14306	0.893977	TRUE	14	101543594	0.0349	9.22699e-06	476306	2	high	4.11969e-05	19.623
Esophageal cancer	Genus Intestinimonas	rs1045670	A	G	A	G	0.1907	0.0327544	0.0596	12	113335681	0.0321077	14306	0.233536	TRUE	12	113335681	0.0379	4.88304e-07	476306	2	high	5.31513e-05	25.3175
Esophageal cancer	Genus Intestinimonas	rs11065774	A	G	A	G	0.3412	0.00806014	0.0855	12	111355326	0.0402867	14306	0.765625	TRUE	12	111355326	0.0481	1.2939e-12	476306	2	high	0.000105632	50.3183
Esophageal cancer	Genus Intestinimonas	rs115086863	C	T	C	T	-0.4913	0.0739623	0.0507	5	66908168	0.0549727	14306	0.184404	TRUE	5	66806197	0.1054	3.14101e-06	476306	2	high	4.56149e-05	21.7275
Esophageal cancer	Genus Intestinimonas	rs12203623	A	G	A	G	0.2774	0.00717007	0.1481	6	95977915	0.0178644	14306	0.596899	TRUE	6	95977915	0.0627	9.68791e-06	476306	2	high	4.10936e-05	19.5738
Esophageal cancer	Genus Intestinimonas	rs1339961	G	T	G	T	0.1637	-0.00611569	0.3002	1	193296113	0.014207	14306	0.666764	TRUE	1	193296113	0.0307	1.011e-07	476306	2	high	5.9691e-05	28.4327
Esophageal cancer	Genus Intestinimonas	rs1409582	T	C	T	C	0.1978	0.01046	0.8767	13	75086449	0.0210201	14306	0.644327	TRUE	13	75086449	0.0443	8.02195e-06	476306	2	high	4.18544e-05	19.9362
Esophageal cancer	Genus Intestinimonas	rs1999375	C	A	C	A	0.1511	0.00711497	0.3857	6	167576698	0.0132676	14306	0.598414	TRUE	6	167576698	0.03	4.93901e-07	476306	2	high	5.32571e-05	25.3679
Esophageal cancer	Genus Intestinimonas	rs2238675	T	C	T	C	0.2179	0.0211218	0.1123	19	19336608	0.0199805	14306	0.231203	TRUE	19	19336608	0.0475	4.517e-06	476306	2	high	4.41796e-05	21.0439
Esophageal cancer	Genus Intestinimonas	rs2533449	G	T	G	T	0.1629	0.029883	0.7048	7	69147703	0.0141106	14306	0.0336496	TRUE	7	69147703	0.0323	4.77595e-07	476306	2	high	5.33984e-05	25.4352
Esophageal cancer	Genus Intestinimonas	rs284787	A	G	A	G	-0.291	-0.0145289	0.2197	4	100333556	0.0155009	14306	0.338578	TRUE	4	100333556	0.0339	8.26228e-18	476306	2	high	0.00015468	73.686
Esophageal cancer	Genus Intestinimonas	rs577449462	C	A	C	A	0.3944	0.0422625	0.0676	6	31904306	0.0302805	14306	0.171363	TRUE	6	31900232	0.0884	8.20503e-06	476306	2	high	4.17893e-05	19.9052
Esophageal cancer	Genus Intestinimonas	rs61987837	T	C	T	C	0.3721	0.0350272	0.0885	14	65739107	0.0237174	14306	0.13108	TRUE	14	65739107	0.0812	4.60797e-06	476306	2	high	4.40861e-05	20.9993
Esophageal cancer	Genus Intestinimonas	rs62257632	A	C	A	C	0.5731	-0.0130459	0.0427	3	4065339	0.0304415	14306	0.733	TRUE	3	4058909	0.1122	3.22597e-07	476306	2	high	5.47728e-05	26.09
Esophageal cancer	Genus Intestinimonas	rs62290900	G	A	G	A	0.4553	-0.0280585	0.0517	3	185753244	0.0310828	14306	0.349436	TRUE	3	185753244	0.1001	5.37601e-06	476306	2	high	4.34332e-05	20.6883
Esophageal cancer	Genus Intestinimonas	rs62305755	A	G	A	G	0.2175	0.0342156	0.1988	4	100150020	0.015876	14306	0.0317592	TRUE	4	100150020	0.043	4.26904e-07	476306	2	high	5.37121e-05	25.5847
Esophageal cancer	Genus Intestinimonas	rs890489	A	G	A	G	0.3051	0.0133145	0.1302	17	53713610	0.0213503	14306	0.484207	TRUE	17	53713610	0.0686	8.73595e-06	476306	2	high	4.15271e-05	19.7804
Esophageal cancer	Genus Intestinimonas	rs9308343	A	G	A	G	0.1593	-0.000563723	0.5457	16	87224857	0.0129923	14306	0.93277	TRUE	16	87224857	0.0355	7.01003e-06	476306	2	high	4.22737e-05	20.136
Esophageal cancer	Genus Ruminococcaceae UCG003	rs10220507	G	A	G	A	-0.1546	-0.0175431	0.3091	14	101543594	0.0128689	14306	0.168073	TRUE	14	101543594	0.0349	9.22699e-06	476306	2	high	4.11969e-05	19.623
Esophageal cancer	Genus Ruminococcaceae UCG003	rs1045670	A	G	A	G	0.1907	0.0315827	0.0596	12	113335681	0.0294469	14306	0.162899	TRUE	12	113335681	0.0379	4.88304e-07	476306	2	high	5.31513e-05	25.3175
Esophageal cancer	Genus Ruminococcaceae UCG003	rs11065774	A	G	A	G	0.3412	0.0472552	0.0855	12	111355326	0.0358608	14306	0.191813	TRUE	12	111355326	0.0481	1.2939e-12	476306	2	high	0.000105632	50.3183
Esophageal cancer	Genus Ruminococcaceae UCG003	rs115086863	C	T	C	T	-0.4913	0.0102024	0.0507	5	66895252	0.0541091	14306	0.840908	TRUE	5	66806197	0.1054	3.14101e-06	476306	2	high	4.56149e-05	21.7275
Esophageal cancer	Genus Ruminococcaceae UCG003	rs12203623	A	G	A	G	0.2774	-0.012978	0.1481	6	95977915	0.0163707	14306	0.402187	TRUE	6	95977915	0.0627	9.68791e-06	476306	2	high	4.10936e-05	19.5738
Esophageal cancer	Genus Ruminococcaceae UCG003	rs1339961	G	T	G	T	0.1637	0.0203949	0.3002	1	193296113	0.0130005	14306	0.118673	TRUE	1	193296113	0.0307	1.011e-07	476306	2	high	5.9691e-05	28.4327
Esophageal cancer	Genus Ruminococcaceae UCG003	rs1409582	T	C	T	C	0.1978	0.0142618	0.8767	13	75086449	0.019375	14306	0.351197	TRUE	13	75086449	0.0443	8.02195e-06	476306	2	high	4.18544e-05	19.9362
Esophageal cancer	Genus Ruminococcaceae UCG003	rs1999375	C	A	C	A	0.1511	-0.00351958	0.3857	6	167576698	0.0121493	14306	0.763623	TRUE	6	167576698	0.03	4.93901e-07	476306	2	high	5.32571e-05	25.3679
Esophageal cancer	Genus Ruminococcaceae UCG003	rs2238675	T	C	T	C	0.2179	-0.0148181	0.1123	19	19336608	0.018365	14306	0.464563	TRUE	19	19336608	0.0475	4.517e-06	476306	2	high	4.41796e-05	21.0439
Esophageal cancer	Genus Ruminococcaceae UCG003	rs2533449	G	T	G	T	0.1629	-0.00668222	0.7048	7	69147703	0.0129485	14306	0.612161	TRUE	7	69147703	0.0323	4.77595e-07	476306	2	high	5.33984e-05	25.4352
Esophageal cancer	Genus Ruminococcaceae UCG003	rs284787	A	G	A	G	-0.291	-0.0175177	0.2197	4	100333556	0.0142031	14306	0.235759	TRUE	4	100333556	0.0339	8.26228e-18	476306	2	high	0.00015468	73.686
Esophageal cancer	Genus Ruminococcaceae UCG003	rs577449462	C	A	C	A	0.3944	0.0115347	0.0676	6	31904306	0.0281361	14306	0.732563	TRUE	6	31900232	0.0884	8.20503e-06	476306	2	high	4.17893e-05	19.9052
Esophageal cancer	Genus Ruminococcaceae UCG003	rs61987837	T	C	T	C	0.3721	-0.0158237	0.0885	14	65739107	0.0217475	14306	0.495459	TRUE	14	65739107	0.0812	4.60797e-06	476306	2	high	4.40861e-05	20.9993
Esophageal cancer	Genus Ruminococcaceae UCG003	rs62257632	A	C	A	C	0.5731	0.0053281	0.0427	3	4065339	0.0293016	14306	0.886117	TRUE	3	4058909	0.1122	3.22597e-07	476306	2	high	5.47728e-05	26.09
Esophageal cancer	Genus Ruminococcaceae UCG003	rs62290900	G	A	G	A	0.4553	0.0385002	0.0517	3	185753244	0.0286542	14306	0.173202	TRUE	3	185753244	0.1001	5.37601e-06	476306	2	high	4.34332e-05	20.6883
Esophageal cancer	Genus Ruminococcaceae UCG003	rs62305755	A	G	A	G	0.2175	0.000140613	0.1988	4	100150020	0.0145517	14306	0.988713	TRUE	4	100150020	0.043	4.26904e-07	476306	2	high	5.37121e-05	25.5847
Esophageal cancer	Genus Ruminococcaceae UCG003	rs890489	A	G	A	G	0.3051	0.0316176	0.1302	17	53713610	0.0197086	14306	0.109434	TRUE	17	53713610	0.0686	8.73595e-06	476306	2	high	4.15271e-05	19.7804
Esophageal cancer	Genus Ruminococcaceae UCG003	rs9308343	A	G	A	G	0.1593	0.0214949	0.5457	16	87224857	0.0119013	14306	0.0743789	TRUE	16	87224857	0.0355	7.01003e-06	476306	2	high	4.22737e-05	20.136
Esophageal cancer	Order Selenomonadales	rs10220507	G	A	G	A	-0.1546	-0.00828442	0.3091	14	101543594	0.0114379	14306	0.45641	TRUE	14	101543594	0.0349	9.22699e-06	476306	2	high	4.11969e-05	19.623
Esophageal cancer	Order Selenomonadales	rs1045670	A	G	A	G	0.1907	-0.00300408	0.0596	12	113335681	0.0260923	14306	0.61029	TRUE	12	113335681	0.0379	4.88304e-07	476306	2	high	5.31513e-05	25.3175
Esophageal cancer	Order Selenomonadales	rs11065774	A	G	A	G	0.3412	-0.00142436	0.0855	12	111355326	0.0313067	14306	0.981593	TRUE	12	111355326	0.0481	1.2939e-12	476306	2	high	0.000105632	50.3183
Esophageal cancer	Order Selenomonadales	rs115086863	C	T	C	T	-0.4913	0.0663068	0.0507	5	66895252	0.0484575	14306	0.24014	TRUE	5	66806197	0.1054	3.14101e-06	476306	2	high	4.56149e-05	21.7275
Esophageal cancer	Order Selenomonadales	rs12203623	A	G	A	G	0.2774	-0.0101965	0.1481	6	95977915	0.0145618	14306	0.585692	TRUE	6	95977915	0.0627	9.68791e-06	476306	2	high	4.10936e-05	19.5738
Esophageal cancer	Order Selenomonadales	rs1339961	G	T	G	T	0.1637	0.000704092	0.3002	1	193296113	0.0115826	14306	0.967068	TRUE	1	193296113	0.0307	1.011e-07	476306	2	high	5.9691e-05	28.4327
Esophageal cancer	Order Selenomonadales	rs1409582	T	C	T	C	0.1978	0.0198499	0.8767	13	75086449	0.017218	14306	0.311649	TRUE	13	75086449	0.0443	8.02195e-06	476306	2	high	4.18544e-05	19.9362
Esophageal cancer	Order Selenomonadales	rs1999375	C	A	C	A	0.1511	-0.0149908	0.3857	6	167576698	0.0108238	14306	0.171153	TRUE	6	167576698	0.03	4.93901e-07	476306	2	high	5.32571e-05	25.3679
Esophageal cancer	Order Selenomonadales	rs2238675	T	C	T	C	0.2179	-0.0373501	0.1123	19	19336608	0.0163086	14306	0.0220095	TRUE	19	19336608	0.0475	4.517e-06	476306	2	high	4.41796e-05	21.0439
Esophageal cancer	Order Selenomonadales	rs2533449	G	T	G	T	0.1629	-0.00520783	0.7048	7	69147703	0.0115076	14306	0.653194	TRUE	7	69147703	0.0323	4.77595e-07	476306	2	high	5.33984e-05	25.4352
Esophageal cancer	Order Selenomonadales	rs284787	A	G	A	G	-0.291	0.000959623	0.2197	4	100333556	0.0126627	14306	0.955814	TRUE	4	100333556	0.0339	8.26228e-18	476306	2	high	0.00015468	73.686
Esophageal cancer	Order Selenomonadales	rs577449462	C	A	C	A	0.3944	-0.00622884	0.0676	6	31904306	0.0249383	14306	0.77602	TRUE	6	31900232	0.0884	8.20503e-06	476306	2	high	4.17893e-05	19.9052
Esophageal cancer	Order Selenomonadales	rs61987837	T	C	T	C	0.3721	-0.0186395	0.0885	14	65739107	0.0193441	14306	0.327347	TRUE	14	65739107	0.0812	4.60797e-06	476306	2	high	4.40861e-05	20.9993
Esophageal cancer	Order Selenomonadales	rs62257632	A	C	A	C	0.5731	0.00948553	0.0427	3	4065339	0.0262011	14306	0.761768	TRUE	3	4058909	0.1122	3.22597e-07	476306	2	high	5.47728e-05	26.09
Esophageal cancer	Order Selenomonadales	rs62290900	G	A	G	A	0.4553	-0.0466058	0.0517	3	185753244	0.0254597	14306	0.0693107	TRUE	3	185753244	0.1001	5.37601e-06	476306	2	high	4.34332e-05	20.6883
Esophageal cancer	Order Selenomonadales	rs62305755	A	G	A	G	0.2175	0.00997297	0.1988	4	100150020	0.0129504	14306	0.457979	TRUE	4	100150020	0.043	4.26904e-07	476306	2	high	5.37121e-05	25.5847
Esophageal cancer	Order Selenomonadales	rs890489	A	G	A	G	0.3051	-0.0284496	0.1302	17	53713610	0.0175193	14306	0.0912704	TRUE	17	53713610	0.0686	8.73595e-06	476306	2	high	4.15271e-05	19.7804
Esophageal cancer	Order Selenomonadales	rs9308343	A	G	A	G	0.1593	-0.00457022	0.5457	16	87224857	0.0105995	14306	0.663076	TRUE	16	87224857	0.0355	7.01003e-06	476306	2	high	4.22737e-05	20.136
